# Supplementary material for: Association between body mass index and short-term mortality in patients with intra-abdominal infections: a retrospective, single-centre cohort study using the Medical Information Mart for Intensive Care database
Source: HighWire-hosted journal article supplement (doi:10.1136/bmjopen-2020-046623), 2021-08-01
Supplement: bmjopen-2020-046623supp001_data_supplement.pdf [file bmjopen-2020-046623supp001_data_supplement.pdf]

1 **Supplementary material:**2 **Table S1.ICD-9 codes, diagnostics and number of specific diagnoses by BMI category**

| ICD-9 | diagnostics                                                                                          | n, (%)  |           |         |          | <i>p</i><br>value |
|-------|------------------------------------------------------------------------------------------------------|---------|-----------|---------|----------|-------------------|
|       |                                                                                                      | BMI <25 | BMI 25-30 | BMI >30 | TOTAL    |                   |
| 53110 | Acute gastric ulcer with perforation, without mention of obstruction                                 | 3(0.75) | 2(0.56)   | 2(0.49) | 7(0.60)  | NS                |
| 53111 | Acute gastric ulcer with perforation, with obstruction                                               | 1(0.25) | 0         | 0       | 1(0.08)  | NS                |
| 53120 | Acute gastric ulcer with hemorrhage and perforation, without mention of obstruction                  | 1(0.25) | 0         | 0       | 1(0.08)  | NS                |
| 53150 | Chronic or unspecified gastric ulcer with perforation, without mention of obstruction                | 3(0.75) | 0         | 2(0.49) | 5(0.42)  | NS                |
| 53160 | Chronic or unspecified gastric ulcer with hemorrhage and perforation, without mention of obstruction | 0       | 1(0.28)   | 1(0.24) | 2(0.17)  | NS                |
| 53210 | Acute duodenal ulcer with perforation, without mention of obstruction                                | 2(0.5)  | 3(0.84)   | 3(0.73) | 8(0.68)  | NS                |
| 53220 | Acute duodenal ulcer with hemorrhage and perforation, without mention of obstruction                 | 0(0)    | 4(1.12)   | 2(0.49) | 6(0.51)  | NS                |
| 53250 | Chronic or unspecified duodenal ulcer with perforation,                                              | 4(1)    | 2(0.56)   | 4(1.98) | 10(0.85) | NS                |

|       |                                                                                                    |    |         |              |           |          |    |
|-------|----------------------------------------------------------------------------------------------------|----|---------|--------------|-----------|----------|----|
|       | without mention of obstruction                                                                     |    |         |              |           |          |    |
| 53251 | Chronic unspecified duodenal ulcer with perforation, with obstruction                              | or | 0       | 1(0.28)      | 0         | 1(0.08)  | NS |
| 53260 | Chronic unspecified duodenal ulcer with hemorrhage and perforation, without mention of obstruction | or | 1(0.25) | 4(1.12)      | 0         | 5(0.42)  | NS |
| 53450 | Chronic unspecified gastrojejunal ulcer with perforation, without mention of obstruction           | or | 0       | 1(0.28)      | 1(0.24)   | 2(0.17)  | NS |
| 53641 | Infection of gastrostomy                                                                           | of | 7(1.75) | 4(1.12)      | 6(1.47)   | 17(1.46) | NS |
| 5400  | Acute appendicitis with generalized peritonitis                                                    |    | 7(1.75) | 4(1.12)      | 3(0.73)   | 14(1.20) | NS |
| 5401  | Acute appendicitis with peritoneal abscess                                                         |    | 4(1)    | 3(0.84)      | 5(1.23)   | 12(1.03) | NS |
| 5511  | Umbilical hernia with gangrene                                                                     |    | 0       | 1(0.28)      | 0         | 1(0.08)  | NS |
| 55120 | Ventral hernia, unspecified, with gangrene                                                         |    | 0       | 1(0.28)      | 0         | 1(0.08)  | NS |
| 55129 | Other ventral hernia with gangrene                                                                 |    | 1(0.25) | 0            | 0         | 1(0.08)  | NS |
| 5513  | Diaphragmatic hernia with gangrene                                                                 |    | 1(0.25) | 0            | 1(0.24)   | 2(0.17)  | NS |
| 5518  | Hernia of other specified sites, with gangrene                                                     |    | 1(0.25) | 0            | 0         | 1(0.08)  | NS |
| 56081 | Intestinal peritoneal                                                                              | or | 48a(12) | 25a, b(7.00) | 22b(5.42) | 95(8.16) | NS |

|       |                                                                         |             |               |             |           |       |
|-------|-------------------------------------------------------------------------|-------------|---------------|-------------|-----------|-------|
|       | adhesions with obstruction (postoperative) (postinfection)              |             |               |             |           |       |
| 56722 | Peritoneal abscess                                                      | 23(5.75)    | 25(7.00)      | 20(4.92)    | 68(5.84)  | NS    |
| 56729 | Other suppurative peritonitis                                           | 18(4.5)     | 21(5.88)      | 19(4.67)    | 58(4.98)  | NS    |
| 56738 | Other retroperitoneal abscess                                           | 2(0.5)      | 1(0.28)       | 5(1.23)     | 8(0.68)   | NS    |
| 56789 | Other specified peritonitis                                             | 4(1)        | 5(1.40)       | 4(0.98)     | 13(1.11)  | NS    |
| 5679  | Unspecified peritonitis                                                 | 10(2.5)     | 11(3.08)      | 8(1.97)     | 29(2.49)  | NS    |
| 5680  | Peritoneal adhesions (postoperative) (postinfection)                    | 42(10.5)    | 44(12.3)      | 50(12.31)   | 136(11.6) | NS    |
| 56961 | Infection of colostomy or enterostomy                                   | 2(0.5)      | 1(0.28)       | 4(0.98)     | 7(0.60)   | NS    |
| 56981 | Fistula of intestine, excluding rectum and anus                         | 22(5.5)     | 12(3.36)      | 18(4.43)    | 52(4.47)  | NS    |
| 56983 | Perforation of intestine                                                | 47(11.75)   | 33(9.24)      | 45(11.0)    | 125(10.7) | NS    |
| 5754  | Perforation of gallbladder                                              | 5(1.25)     | 2(0.56)       | 6(1.47)     | 13(1.11)  | NS    |
| 5763  | Perforation of bile duct                                                | 0           | 1(0.28)       | 1(0.24)     | 2(0.17)   | NS    |
| 5764  | Fistula of bile duct                                                    | 4(1)        | 1(0.28)       | 0           | 5(0.42)   | NS    |
| 5770  | Acute pancreatitis                                                      | 137a(34.25) | 144a, b(40.3) | 174b(42.86) | 455(39.1) | 0.037 |
| 53121 | Acute gastric ulcer with hemorrhage and perforation, with obstruction   | 0           | 0             | 0           | 0         | NS    |
| 53151 | Chronic or unspecified gastric ulcer with perforation, with obstruction | 0           | 0             | 0           | 0         | NS    |
| 53161 | Chronic or unspecified gastric                                          | 0           | 0             | 0           | 0         | NS    |

|       |                                                                                                                    |   |   |   |   |    |  |
|-------|--------------------------------------------------------------------------------------------------------------------|---|---|---|---|----|--|
|       | ulcer with<br>hemorrhage and<br>perforation, with<br>obstruction                                                   |   |   |   |   |    |  |
| 53211 | Acute duodenal ulcer with<br>perforation, with<br>obstruction                                                      | 0 | 0 | 0 | 0 | NS |  |
| 53221 | Acute duodenal ulcer with<br>hemorrhage and<br>perforation, with<br>obstruction                                    | 0 | 0 | 0 | 0 | NS |  |
| 53261 | Chronic or unspecified<br>duodenal ulcer with<br>hemorrhage and<br>perforation, with<br>obstruction                | 0 | 0 | 0 | 0 | NS |  |
| 53310 | Acute peptic ulcer of unspecified site<br>with perforation,<br>without mention of<br>obstruction                   | 0 | 0 | 0 | 0 | NS |  |
| 53311 | Acute peptic ulcer of unspecified site<br>with perforation,<br>with obstruction                                    | 0 | 0 | 0 | 0 | NS |  |
| 53320 | Acute peptic ulcer of unspecified site<br>with hemorrhage<br>and perforation,<br>without mention of<br>obstruction | 0 | 0 | 0 | 0 | NS |  |
| 53321 | Acute peptic ulcer of unspecified site<br>with hemorrhage<br>and perforation,<br>with obstruction                  | 0 | 0 | 0 | 0 | NS |  |
| 53350 | Chronic or unspecified peptic<br>ulcer of unspecified<br>site with<br>perforation,                                 | 0 | 0 | 0 | 0 | NS |  |

|       |                                                                                                                         |   |   |   |   |    |  |
|-------|-------------------------------------------------------------------------------------------------------------------------|---|---|---|---|----|--|
|       | without mention of obstruction                                                                                          |   |   |   |   |    |  |
| 53351 | Chronic or unspecified peptic ulcer of unspecified site with perforation, with obstruction                              | 0 | 0 | 0 | 0 | NS |  |
| 53360 | Chronic or unspecified peptic ulcer of unspecified site with hemorrhage and perforation, without mention of obstruction | 0 | 0 | 0 | 0 | NS |  |
| 53361 | Chronic or unspecified peptic ulcer of unspecified site with hemorrhage and perforation, with obstruction               | 0 | 0 | 0 | 0 | NS |  |
| 53410 | Acute gastrojejunal ulcer with perforation, without mention of obstruction                                              | 0 | 0 | 0 | 0 | NS |  |
| 53411 | Acute gastrojejunal ulcer with perforation, with obstruction                                                            | 0 | 0 | 0 | 0 | NS |  |
| 53420 | Acute gastrojejunal ulcer with hemorrhage and perforation, without mention of obstruction                               | 0 | 0 | 0 | 0 | NS |  |
| 53421 | Acute gastrojejunal ulcer with hemorrhage and perforation, with obstruction                                             | 0 | 0 | 0 | 0 | NS |  |
| 53430 | Acute gastrojejunal                                                                                                     | 0 | 0 | 0 | 0 | NS |  |

|       |                                                                                                                |   |   |   |   |    |  |
|-------|----------------------------------------------------------------------------------------------------------------|---|---|---|---|----|--|
|       | ulcer without<br>mention of<br>hemorrhage or<br>perforation,<br>without mention of<br>obstruction              |   |   |   |   |    |  |
| 53451 | Chronic or 0                                                                                                   | 0 | 0 | 0 | 0 | NS |  |
|       | unspecified<br>gastrojejunal ulcer<br>with perforation,<br>with obstruction                                    |   |   |   |   |    |  |
| 53460 | Chronic or 0                                                                                                   | 0 | 0 | 0 | 0 | NS |  |
|       | unspecified<br>gastrojejunal ulcer<br>with hemorrhage<br>and perforation,<br>without mention of<br>obstruction |   |   |   |   |    |  |
| 53461 | Chronic or 0                                                                                                   | 0 | 0 | 0 | 0 | NS |  |
|       | unspecified<br>gastrojejunal ulcer<br>with hemorrhage<br>and perforation,<br>with obstruction                  |   |   |   |   |    |  |
| 53901 | Infection due to 0                                                                                             | 0 | 0 | 0 | 0 | NS |  |
|       | gastric band<br>procedure                                                                                      |   |   |   |   |    |  |
| 53981 | Infection due to 0                                                                                             | 0 | 0 | 0 | 0 | NS |  |
|       | other bariatric<br>procedure                                                                                   |   |   |   |   |    |  |
| 55121 | Incisional ventral 0                                                                                           | 0 | 0 | 0 | 0 | NS |  |
|       | hernia, with<br>gangrene                                                                                       |   |   |   |   |    |  |
| 5519  | Hernia of 0                                                                                                    | 0 | 0 | 0 | 0 | NS |  |
|       | unspecified site,<br>with gangrene                                                                             |   |   |   |   |    |  |
| 56739 | Other 0                                                                                                        | 0 | 0 | 0 | 0 | NS |  |
|       | retroperitoneal<br>infections                                                                                  |   |   |   |   |    |  |
| 5755  | Fistula of 0                                                                                                   | 0 | 0 | 0 | 0 | NS |  |
|       | gallbladder                                                                                                    |   |   |   |   |    |  |

3 Abbreviations: BMI: Body mass index; The letter a and b were used to indicate the  
4 difference between groups and if there is statistical difference between the two  
5 subgroups, different letters shall be used for identification.

6 **TableS2. Univariate analysis of baseline characteristics by BMI category after adjustment of**  
 7 **confounding factors**

|                                       | BMI<25 kg/m <sup>2</sup><br>(n=357) | BMI 25-30<br>kg/m <sup>2</sup><br>(n=357) | BMI>30<br>kg/m <sup>2</sup><br>(n=357) | <i>p</i><br>value |
|---------------------------------------|-------------------------------------|-------------------------------------------|----------------------------------------|-------------------|
| Age,n(%)                              |                                     |                                           |                                        | 0.137             |
| <45                                   | 51(14.29)                           | 47(13.17)                                 | 43(12.04)                              |                   |
| 45-64                                 | 116(32.49) <sup>a</sup>             | 120(33.61) <sup>a,b</sup>                 | 150(42.02) <sup>b</sup>                |                   |
| 65-89                                 | 161(45.10)                          | 171(47.90)                                | 157(43.98)                             |                   |
| >90                                   | 29(8.12) <sup>a</sup>               | 19(5.32) <sup>a</sup>                     | 7(1.96) <sup>b</sup>                   |                   |
| Female, n (%)                         | 167(46.78)                          | 141(39.50)                                | 162(45.38)                             | 0.115             |
| Ethnicity, n (%)                      |                                     |                                           |                                        | 0.199             |
| White                                 | 264(73.95)                          | 254(71.15)                                | 268(75.07)                             |                   |
| Black                                 | 37(10.36)                           | 36(10.08)                                 | 34(9.52)                               |                   |
| Hispanic or latino                    | 10(2.80)                            | 14(3.92)                                  | 8(2.24)                                |                   |
| Asian                                 | 6(1.68)                             | 11(3.08)                                  | 1(0.28)                                |                   |
| Other                                 | 40(11.20)                           | 42(11.76)                                 | 46(12.89)                              |                   |
| Marital status, n (%)                 |                                     |                                           |                                        | 0.303             |
| Married                               | 167(46.78)                          | 196(54.90)                                | 183(51.26)                             |                   |
| Single/divorced/separated/unkn<br>own | 142(39.78)                          | 121(33.89)                                | 128(35.85)                             |                   |
| Widowed                               | 48(11.20)                           | 40(11.20)                                 | 46(12.89)                              |                   |
| Admission type, n (%)                 |                                     |                                           |                                        | 0.036             |
| Elective                              | 33(9.24) <sup>a</sup>               | 50(14.01) <sup>a,b</sup>                  | 55(15.41) <sup>b</sup>                 |                   |
| Emergency/urgent                      | 324(90.76) <sup>a</sup>             | 307(85.99) <sup>a,b</sup>                 | 302(84.59) <sup>b</sup>                |                   |
| Insurance type, n (%)                 |                                     |                                           |                                        | 0.550             |
| Medicare/Medicaid                     | 237(66.39)                          | 236(66.11)                                | 224(62.75)                             |                   |
| Private                               | 108(30.25)                          | 109(30.53)                                | 125(35.01)                             |                   |
| Other                                 | 12(3.36)                            | 12(3.36)                                  | 8(2.24)                                |                   |
| SOFA                                  | 5(3-8) <sup>a</sup>                 | 5(3-7) <sup>a,b</sup>                     | 5(3-9) <sup>b</sup>                    | 0.014             |

|                            |           |           |             |       |
|----------------------------|-----------|-----------|-------------|-------|
| SAPS II                    | 40(30-50) | 39(29-50) | 39(29.5-50) | 0.794 |
| SIRS                       | 3(3-4)    | 3(3-4)    | 3(3-4)      | 0.805 |
| qSOFA                      | 2(1-2)    | 2(1-2)    | 2(1-2)      | 0.122 |
| OASIS                      | 34(27-40) | 33(28-41) | 34(27-41)   | 0.943 |
| Charlson comorbidity index | 1(0-3)    | 2(0-3)    | 1(0-3)      | 0.817 |

8 Abbreviations: BMI: Body mass index; SOFA: sepsis-related organ failure assessment;  
9 SAPSII: Simplified Acute Physiology Score II; SIRS: systemic inflammatory response  
10 syndrome; OASIS: Oxford Acute Severity of Illness Score. The letter a and b were used  
11 to indicate the difference between groups and if there is statistical difference between  
12 the two subgroups, different letters shall be used for identification. Adjusted for age,  
13 gender, admission type, insurance type, marital status, ethnicity.

14  
15  
16  
17  
18  
19  
20  
21  
22  
23  
24  
25  
26  
27  
28  
29  
30  
31  
32  
33  
34  
35  
36  
37  
38  
39  
40  
41



**Table S3. Univariate analysis of clinical outcome by BMI category after adjustment of confounding factors**

|                          | BMI<25 kg/m <sup>2</sup><br>(n=357) | BMI25–30kg/m <sup>2</sup> (n=357) | BMI>30 kg/m <sup>2</sup> (n=357) | <i>p</i> |
|--------------------------|-------------------------------------|-----------------------------------|----------------------------------|----------|
| Mortality,n(%)           |                                     |                                   |                                  |          |
| Hospital mortality       | 69(19.33)                           | 65(18.21)                         | 51(14.29)                        | 0.174    |
| 30-day mortality         | 65(18.21)                           | 47(13.17)                         | 45(12.61)                        | 0.066    |
| 90-day mortality         | 99(27.73)                           | 83(23.25)                         | 76(21.29)                        | 0.119    |
| Length of stay ,day(IQR) |                                     |                                   |                                  |          |
| Hospital LOS             | 14.98(8.53-28.53)                   | 15.39(7.85-27.03)                 | 16.16(9.12-29.87)                | 0.16     |
| Living patients(n=886)   | 15.07(8.85-27.82)                   | 14.33(7.91-24.88)                 | 16.58(9.63-29.93)                | 0.082    |
| Dead patients(n=185)     | 14.16(5.28-29.69)                   | 17.98(7.08-33.25)                 | 13.39(5.95-29.82)                | 0.992    |
| ICU LOS                  | 3.13(1.83-7.81) <sup>a</sup>        | 3.60(1.90-8.91) <sup>a</sup>      | 4.97(2.21-13.45) <sup>b</sup>    | <0.001   |
| Living patients(n=957)   | 3.10(1.78-6.61) <sup>a</sup>        | 3.25(1.82-7.74) <sup>a</sup>      | 4.93(2.21-13.29) <sup>b</sup>    | <0.001   |
| Dead patients(n=185)     | 5.91(2.21-13.96)                    | 11.71(3.74-31.11)                 | 6.86(2.08-15.09)                 | 0.096    |

Abbreviations: BMI: Body mass index; LOS: length of stay. The letter a and b were used to indicate the difference between groups and if there is statistical difference between the two subgroups, different letters shall be used for identification. Adjusted for age, gender, admission type, insurance type, marital status, ethnicity.

71  
72

|                        |            |            |            |       |
|------------------------|------------|------------|------------|-------|
| Ventilation , n(%)     | 188(52.66) | 203(56.86) | 219(61.34) | 0.064 |
| Dialysis, n (%)        | 21(5.9)    | 30(8.4)    | 28(7.8)    | 0.4   |
| Vasoactive agent, n(%) | 123(34.45) | 123(34.45) | 129(36.13) | 0.863 |

73  
74  
75  
76  
77  
78  
79  
80  
81  
82  
83  
84  
85  
86  
87  
88  
89  
90  
91  
92  
93  
94  
95  
96  
97  
98  
99  
100  
101  
102  
103  
104  
105  
106  
107  
108

109

| Table S5. Univariate analysis of laboratory examination by BMI category |                                     |                                     |                                    |        |
|-------------------------------------------------------------------------|-------------------------------------|-------------------------------------|------------------------------------|--------|
|                                                                         | BMI<25kg/m <sup>2</sup>             | BMI25-30kg/m <sup>2</sup>           | BMI>30kg/m <sup>2</sup>            | p      |
| HGB                                                                     | 9.50(8.30-10.70),n=354              | 9.60(8.4-10.80),n=355               | 9.70(8.6-11.2),n=356               | 0.053  |
| WBC                                                                     | 10(6.1-14.53),n=354                 | 9.7(6.5-13.8),n=355                 | 10.7(6.83-14.58),n=356             | 0.145  |
| PLT                                                                     | 184.5(114.5-269.5)n=354             | 182(124-252)n=355                   | 187(123.5-269.5)n=357              | 0.732  |
| CRE                                                                     | 1.1(0.8-1.8) <sup>a</sup> ,n=354    | 1.2(0.9-2.2) <sup>b</sup> ,n=355    | 1.4(0.9-2.3) <sup>b</sup> ,n=357   | <0.001 |
| BUN                                                                     | 25(16-39),n=354                     | 25(16-41),n=355                     | 26(16-44.5),n=357                  | 0.57   |
| ALB                                                                     | 2.6(2.2-3.1),n=208                  | 2.7(2.2-3.2),n=215                  | 2.7(2.3-3.1),n=201                 | 0.597  |
| Cl                                                                      | 108(105-113) <sup>a,b</sup> ,n=354  | 109(105-112) <sup>a</sup> ,n=356    | 108(104-112) <sup>b</sup> ,n=357   | 0.021  |
| K                                                                       | 3.6(3.2-4.0),n=354                  | 3.7(3.3-4.0),n=356                  | 3.7(3.4-4.1),n=357                 | 0.124  |
| Na                                                                      | 135(132-139) <sup>a</sup> ,n=354    | 136(133-139) <sup>a,b</sup> ,n=356  | 137(134-139) <sup>b</sup> ,n=357   | 0.042  |
| GLU                                                                     | 152(122.75-194) <sup>a</sup> ,n=354 | 154(125-195.75) <sup>a</sup> ,n=356 | 168(136.5-224) <sup>b</sup> ,n=357 | 0.001  |
| LAC                                                                     | 2.6(1.6-4.6),n=279                  | 2.7(1.5-4.425),n=286                | 2.4(1.4-4.2),n=287                 | 0.329  |
| BIL                                                                     | 1(0.5-2.85)                         | 1.2(0.6-2.425)                      | 1.1(0.6-2.5)                       | 0.397  |

110

111

112

113

114

115

116

Abbreviations: BMI: Body mass index; HGB: hemoglobin; WBC: white blood cell count; PLT: platelet count; ALB: albumin; CRE: creatinine; BUN: urea nitrogen; GLU: glucose; LAC: lactate; BIL: bilirubin; Na: sodium; Cl: chlorine; K: potassium. The letter a and b were used to indicate the difference between groups and if there is statistical difference between the two subgroups, different letters shall be used for identification. Adjusted for age, gender, admission type, insurance type, marital status, ethnicity.

117

118

119

120

121

122

123

124

125

126

127

128

129

130

131

132

133

134

135

|     |                                                                                       |                                       |                                      |
|-----|---------------------------------------------------------------------------------------|---------------------------------------|--------------------------------------|
| 136 | <b>Table S6. The results of subgroup analysis of multi-factor regression analysis</b> |                                       |                                      |
|     | Exposure                                                                              | Acute pancreatitis HR, <i>p</i> Value | Other diagnostics HR, <i>p</i> Value |
|     | Non-adjusted                                                                          |                                       |                                      |
|     | BMI                                                                                   | 0.98 (0.96, 1.00), 0.0612             | 0.98 (0.96, 0.99), 0.0009            |
|     | BMI                                                                                   |                                       |                                      |
|     | <25 kg/m <sup>2</sup>                                                                 | 1.0(Reference)                        | 1.0(Reference)                       |
|     | 25-30 kg/m <sup>2</sup>                                                               | 0.66 (0.46, 0.93), 0.0188             | 0.89 (0.70, 1.13), 0.3328            |
|     | >30 kg/m <sup>2</sup>                                                                 | 0.67 (0.49, 0.94), 0.0184             | 0.72 (0.57, 0.92), 0.0086            |
|     | Adjust                                                                                |                                       |                                      |
|     | BMI                                                                                   | 0.98 (0.95, 1.00), 0.0821             | 0.97 (0.95, 0.99), 0.0047            |
|     | BMI                                                                                   |                                       |                                      |
|     | <25 kg/m <sup>2</sup>                                                                 | 1.0(Reference)                        | 1.0(Reference)                       |
|     | 25-30 kg/m <sup>2</sup>                                                               | 0.65 (0.42, 1.01), 0.0534             | 0.81 (0.57, 1.15), 0.2391            |
|     | >30 kg/m <sup>2</sup>                                                                 | 0.70 (0.46, 1.08), 0.1065             | 0.61 (0.42, 0.89), 0.0103            |
| 137 | Adjusted for gender; admission age; SOFA; admission type; insurance; marital status;  |                                       |                                      |
| 138 | ethnicity; HGB; GLU; ALB; Charlson comorbidity index.                                 |                                       |                                      |
| 139 |                                                                                       |                                       |                                      |
| 140 |                                                                                       |                                       |                                      |
| 141 |                                                                                       |                                       |                                      |
| 142 |                                                                                       |                                       |                                      |
| 143 |                                                                                       |                                       |                                      |
| 144 |                                                                                       |                                       |                                      |
| 145 |                                                                                       |                                       |                                      |
| 146 |                                                                                       |                                       |                                      |
| 147 |                                                                                       |                                       |                                      |
| 148 |                                                                                       |                                       |                                      |
| 149 |                                                                                       |                                       |                                      |
| 150 |                                                                                       |                                       |                                      |
| 151 |                                                                                       |                                       |                                      |
| 152 |                                                                                       |                                       |                                      |
| 153 |                                                                                       |                                       |                                      |
| 154 |                                                                                       |                                       |                                      |
| 155 |                                                                                       |                                       |                                      |
| 156 |                                                                                       |                                       |                                      |
| 157 |                                                                                       |                                       |                                      |
| 158 |                                                                                       |                                       |                                      |
| 159 |                                                                                       |                                       |                                      |
| 160 |                                                                                       |                                       |                                      |
| 161 |                                                                                       |                                       |                                      |
| 162 |                                                                                       |                                       |                                      |
| 163 |                                                                                       |                                       |                                      |
| 164 |                                                                                       |                                       |                                      |
| 165 |                                                                                       |                                       |                                      |
| 166 |                                                                                       |                                       |                                      |

167

**Table S7. The results of multi-factor regression analysis after multiple imputation**

| Exposure                | MI.ITER= 0<br>HR, <i>p</i> value | MI.ITER= 1<br>HR, <i>p</i> value | MI.ITER= 2 HR,<br><i>p</i> value | MI.ITER= 3<br>HR, <i>p</i> value | MI.ITER= 4<br>HR, <i>p</i> value | MI.ITER= 5 HR,<br><i>p</i> value |
|-------------------------|----------------------------------|----------------------------------|----------------------------------|----------------------------------|----------------------------------|----------------------------------|
| Non-adjusted            |                                  |                                  |                                  |                                  |                                  |                                  |
| BMI                     | 0.98 (0.97,<br>0.99) <0.0001     |
| BMI                     |                                  |                                  |                                  |                                  |                                  |                                  |
| <25 kg/m <sup>2</sup>   | 1.0(Reference)                   | 1.0(Reference)                   | 1.0(Reference)                   | 1.0(Reference)                   | 1.0(Reference)                   | 1.0(Reference)                   |
| 25-30 kg/m <sup>2</sup> | 0.78 (0.64,<br>0.96) 0.0158      | 0.75 (0.64,<br>0.88) 0.0005      | 0.85 (0.73,<br>1.01) 0.0589      | 0.81 (0.69,<br>0.95) 0.0110      | 0.82 (0.69,<br>0.96) 0.0159      | 0.79 (0.67,<br>0.93) 0.0049      |
| >30 kg/m <sup>2</sup>   | 0.68 (0.56,<br>0.83) 0.0001      | 0.68 (0.58,<br>0.80) <0.0001     | 0.68 (0.58,<br>0.80) <0.0001     | 0.66 (0.56,<br>0.78) <0.0001     | 0.71 (0.61,<br>0.84) <0.0001     | 0.68 (0.57,<br>0.80) <0.0001     |
| Adjusted                |                                  |                                  |                                  |                                  |                                  |                                  |
| BMI                     | 0.98 (0.96,<br>0.99) <0.0001     | 0.98 (0.97,<br>0.99) <0.0001     |
| BMI                     |                                  |                                  |                                  |                                  |                                  |                                  |
| <25 kg/m <sup>2</sup>   | 1.0(Reference)                   | 1.0(Reference)                   | 1.0(Reference)                   | 1.0(Reference)                   | 1.0(Reference)                   | 1.0(Reference)                   |
| 25-30 kg/m <sup>2</sup> | 0.74 (0.61,<br>0.91) 0.0042      | 0.74 (0.63,<br>0.88) 0.0004      | 0.82 (0.69,<br>0.97) 0.0192      | 0.79 (0.67,<br>0.94) 0.0069      | 0.80 (0.68,<br>0.95) 0.0088      | 0.77 (0.65,<br>0.91) 0.0019      |
| >30 kg/m <sup>2</sup>   | 0.65 (0.53,<br>0.79) <0.0001     | 0.65 (0.55,<br>0.77) <0.0001     | 0.65 (0.55,<br>0.77) <0.0001     | 0.63 (0.53,<br>0.74) <0.0001     | 0.68 (0.58,<br>0.81) <0.0001     | 0.66 (0.56,<br>0.79) <0.0001     |

Adjusted for gender; admission age; SOFA; admission type; insurance; marital status;  
ethnicity; HGB; GLU; ALB; Charlson comorbidity index.

170

171

172

173

174

175

176

177

178

179

180

181

182

183

184

185

186

187

188

189

190

|                    |                                                                                           |                              |                              |                              |                              |                              |
|--------------------|-------------------------------------------------------------------------------------------|------------------------------|------------------------------|------------------------------|------------------------------|------------------------------|
| 191                | Table S8. Subgroup analysis of multi-factor regression analysis after multiple imputation |                              |                              |                              |                              |                              |
| Exposure           | MI.ITER=0 HR,<br>p value                                                                  | MI.ITER= 1<br>HR, p value    | MI.ITER= 2<br>HR, p value    | MI.ITER= 3<br>HR, p value    | MI.ITER= 4<br>HR, p value    | MI.ITER= 5<br>HR, p value    |
| Acute pancreatitis |                                                                                           |                              |                              |                              |                              |                              |
| Non-adjusted       |                                                                                           |                              |                              |                              |                              |                              |
| BMI                | 0.98 (0.96,<br>1.00) 0.0612                                                               | 0.98 (0.97,<br>1.00) 0.0348  | 0.98 (0.96,<br>1.00) 0.0288  | 0.98 (0.97,<br>1.00) 0.0491  | 0.99 (0.97,<br>1.00) 0.0863  | 0.99 (0.97,<br>1.01) 0.1758  |
| Adjust             |                                                                                           |                              |                              |                              |                              |                              |
| BMI                | 0.99 (0.97,<br>1.01) 0.3791                                                               | 0.99 (0.97,<br>1.01) 0.1755  | 0.99 (0.97,<br>1.01) 0.1986  | 0.99 (0.97,<br>1.01) 0.2298  | 0.99 (0.97,<br>1.01) 0.2988  | 1.00 (0.98,<br>1.02) 0.8201  |
| Other patients     |                                                                                           |                              |                              |                              |                              |                              |
| Non-adjusted       |                                                                                           |                              |                              |                              |                              |                              |
| BMI                | 0.98 (0.96,<br>0.99) 0.0009                                                               | 0.97 (0.96,<br>0.99) <0.0001 | 0.98 (0.96,<br>0.99) <0.0001 | 0.97 (0.96,<br>0.98) <0.0001 | 0.98 (0.96,<br>0.99) <0.0001 | 0.97 (0.96,<br>0.99) <0.0001 |
| Adjust             |                                                                                           |                              |                              |                              |                              |                              |
| BMI                | 0.97 (0.96,<br>0.98) <0.0001                                                              | 0.97 (0.96,<br>0.98) <0.0001 | 0.97 (0.96,<br>0.98) <0.0001 | 0.97 (0.96,<br>0.98) <0.0001 | 0.97 (0.96,<br>0.98) <0.0001 | 0.97 (0.96,<br>0.98) <0.0001 |

192 Adjusted for gender; admission age; SOFA; admission type; insurance; marital status;  
193 ethnicity; HGB; GLU; ALB; Charlson comorbidity index.

194  
195  
196  
197  
198  
199  
200  
201  
202  
203  
204  
205  
206  
207  
208  
209

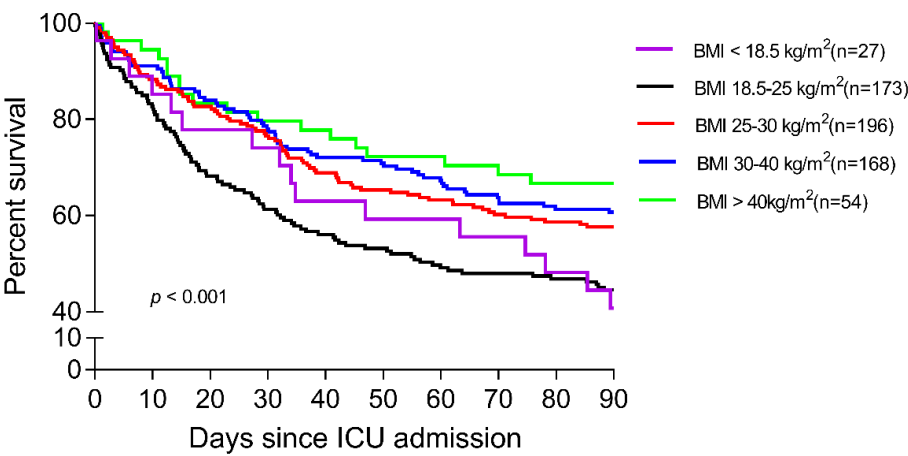

210

211 **Figure S1. Kaplan–Meier curve for 90-days survival stratified by BMI.**

212 Abbreviations: BMI: Body mass index; Fig.S1 represents 90-days Kaplan–Meier

213 curves, P<0.001 by log-rank test.

214

215

216

217

218

219

220

221

222

223

224

225

226

227

228

229

230

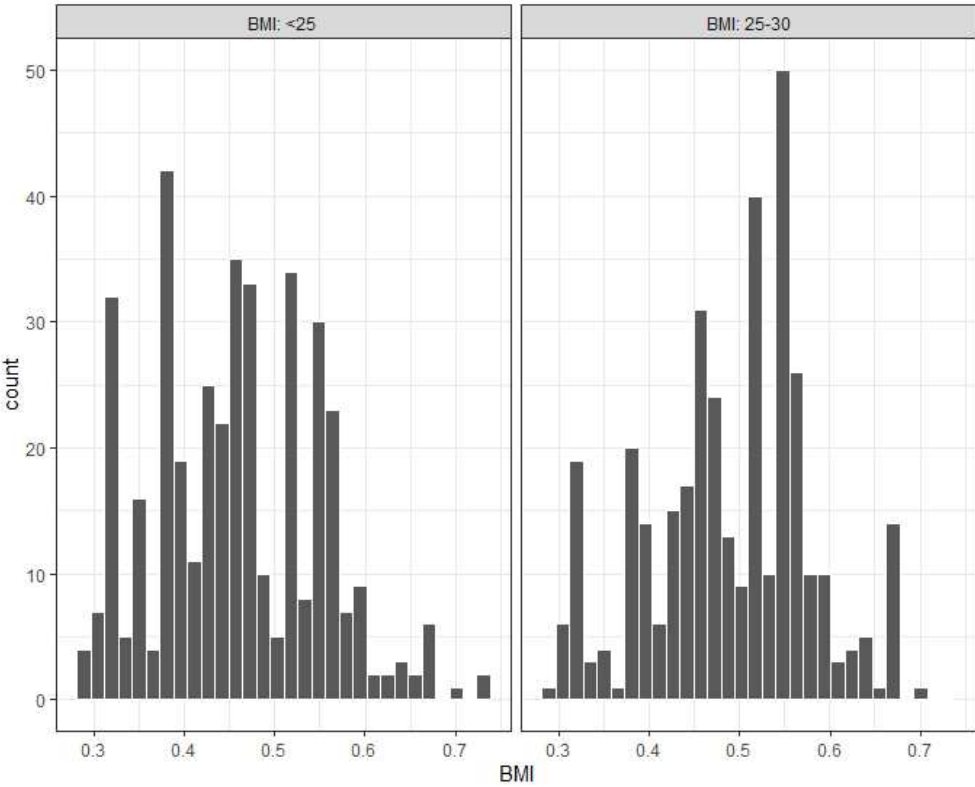

231  
232 **Figure S2. Propensity score counting of normal and overweight patients.**  
233 Abbreviations: BMI: Body mass index;  
234 Adjusted for age, gender, admission type, insurance type, marital status, ethnicity.  
235



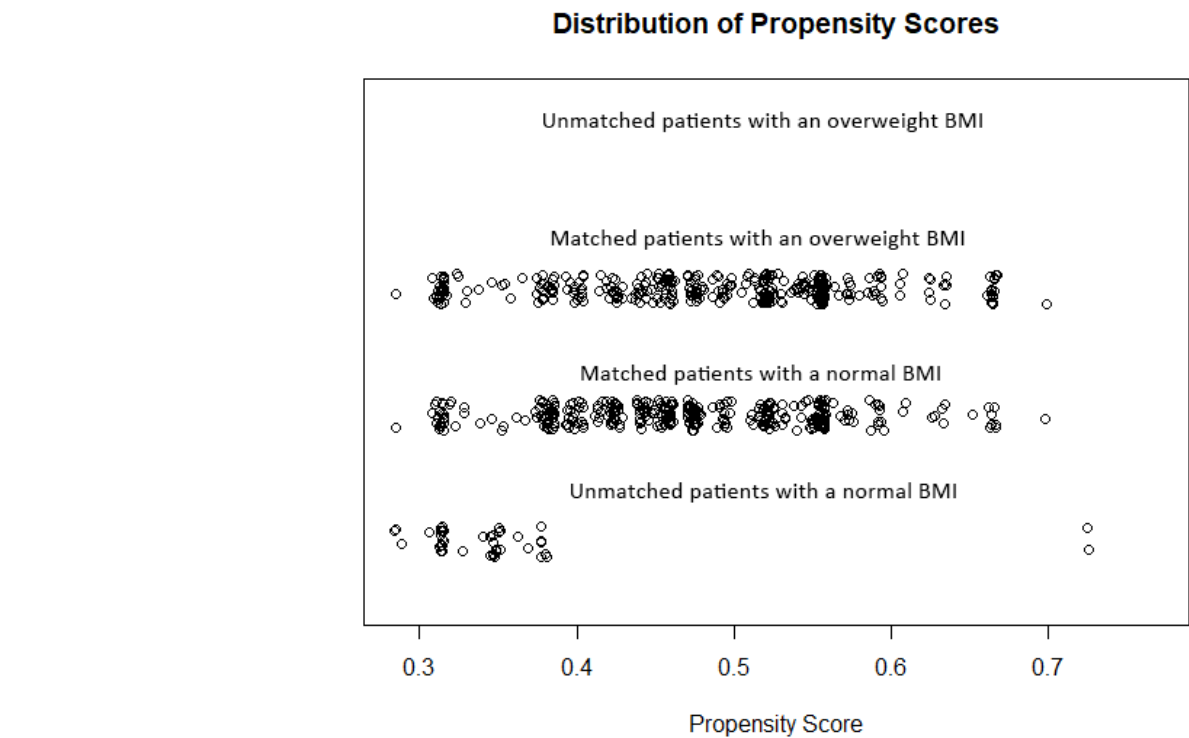

236

237 **Figure S3. Distribution of propensity scores between normal and overweight**

238 **patients.** Abbreviations: BMI: Body mass index;

239 Adjusted for age, gender, admission type, insurance type, marital status, ethnicity.

240

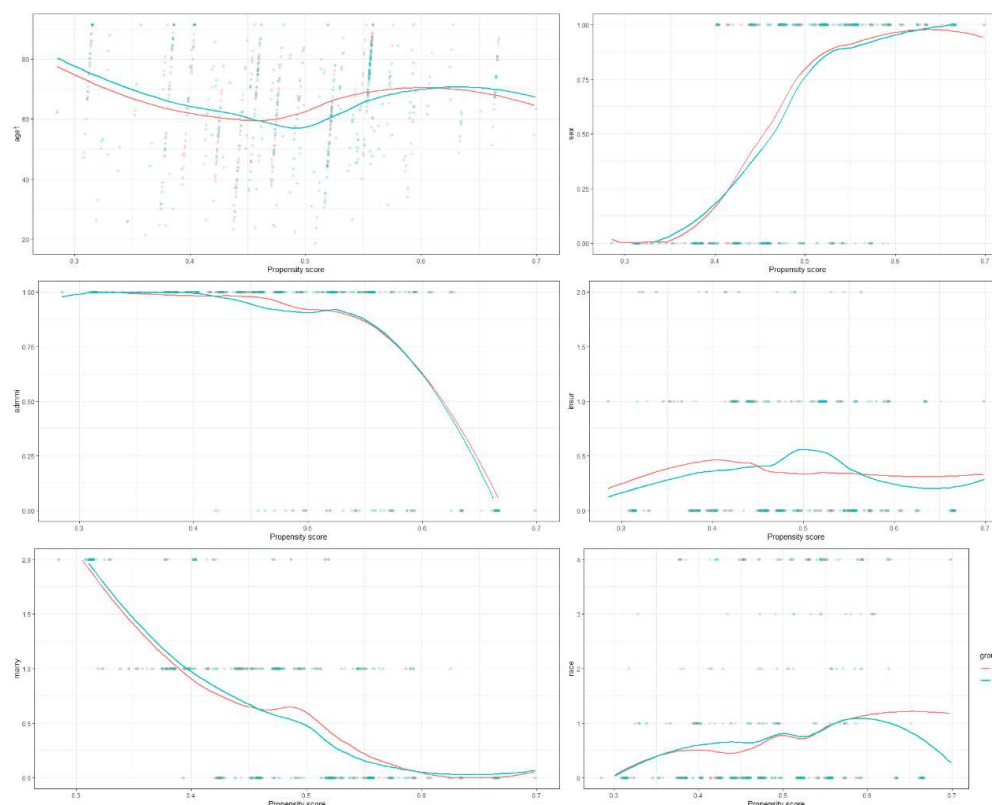

241

242 **Figure S4. Trend of baseline characteristics after adjustment for confounding**  
 243 **factors.** Abbreviations: BMI: Body mass index; age1: Admission age of patients; sex:  
 244 gender of patients; admmt: Admission type of patients; insur: Insurance type of patients;  
 245 marry: Marital status of patients; race: Ethnicity of patients; group 0: patients with an  
 246 overweight BMI; group 1: patients with a normal BMI;  
 247 Adjusted for age , gender ,admission type ,insurance type ,marital status , ethnicity.

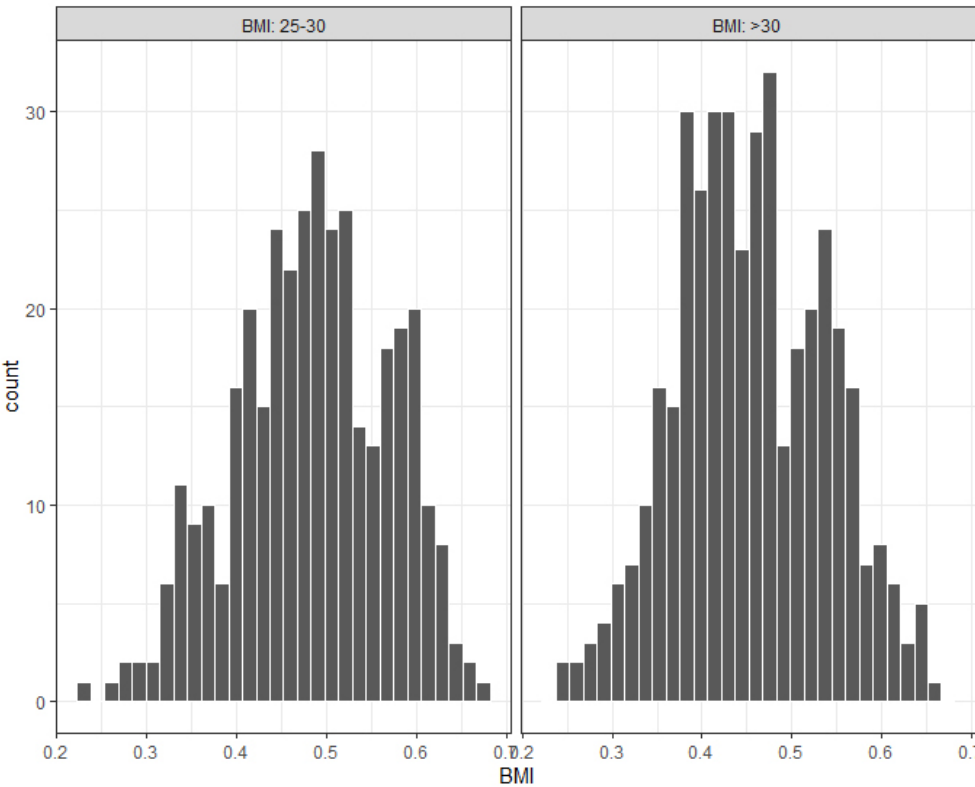

248

249 **Figure S5. Propensity score counting of obese and overweight patients.**

250 Abbreviations: BMI: Body mass index;

251 Adjusted for age , gender ,admission type ,insurance type ,marital status , ethnicity.

252

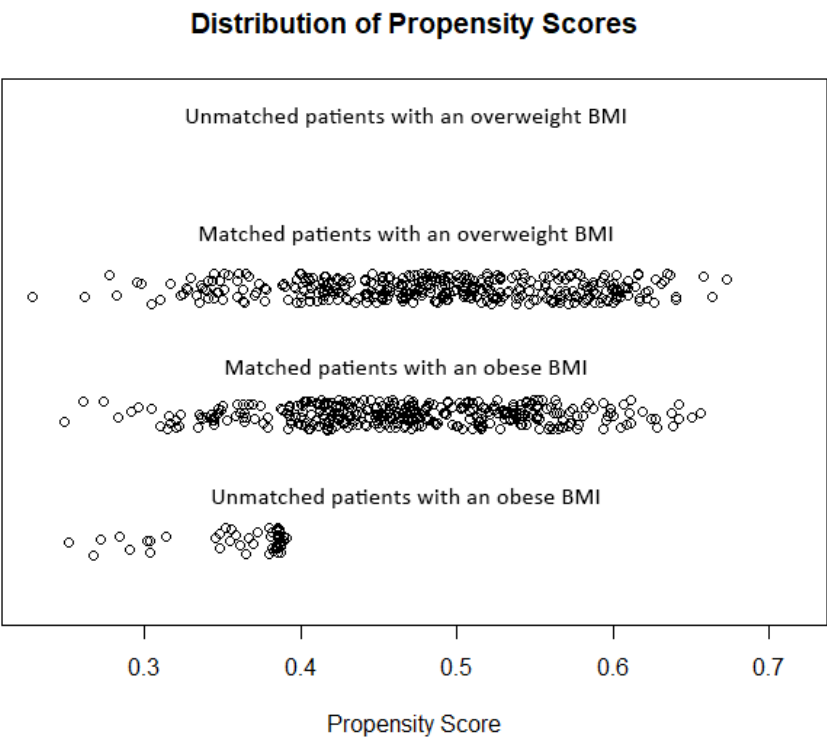

253

254 **Figure S6. Distribution of propensity scores between obese and overweight**

255 **patients.** Abbreviations: BMI: Body mass index;

256 Adjusted for age , gender ,admission type, insurance type ,marital status , ethnicity.

257

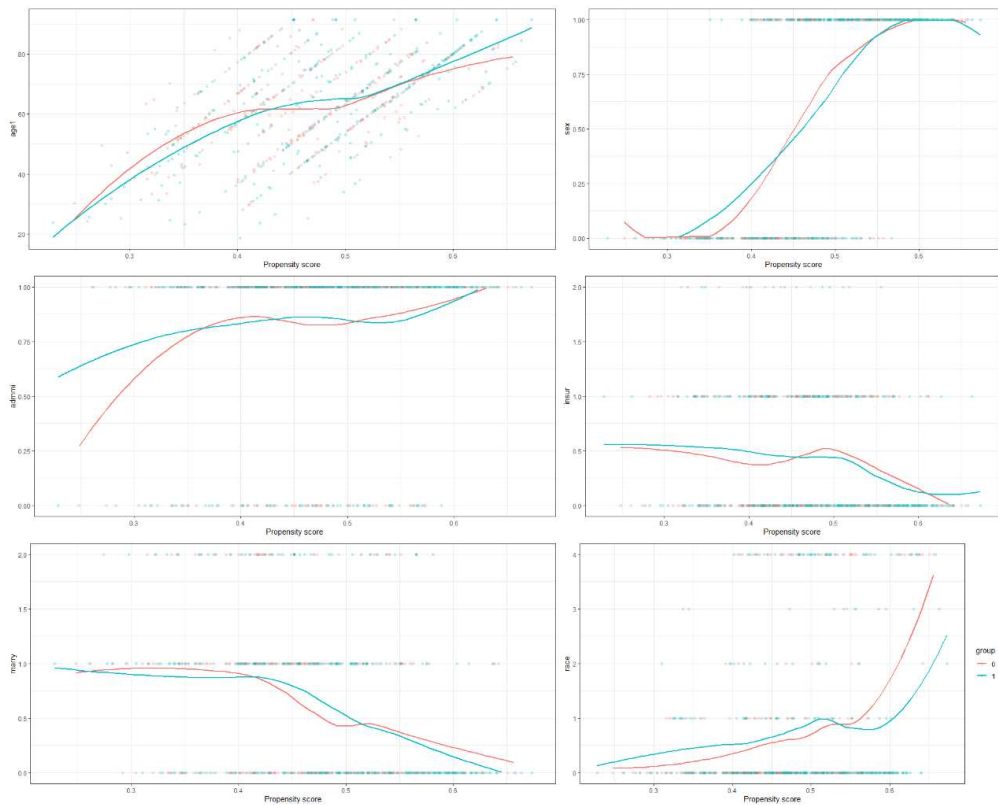

**Figure S7. Trend of baseline characteristics after adjustment for confounding factors.** Abbreviations: BMI: Body mass index; age1: Admission age of patients; sex: gender of patients; admmt: Admission type of patients; insur: Insurance type of patients; marry: Marital status of patients; race: Ethnicity of patients; group 0: patients with an overweight BMI; group 1: patients with a obese BMI; Adjusted for age, gender, admission type, insurance type, marital status, ethnicity.

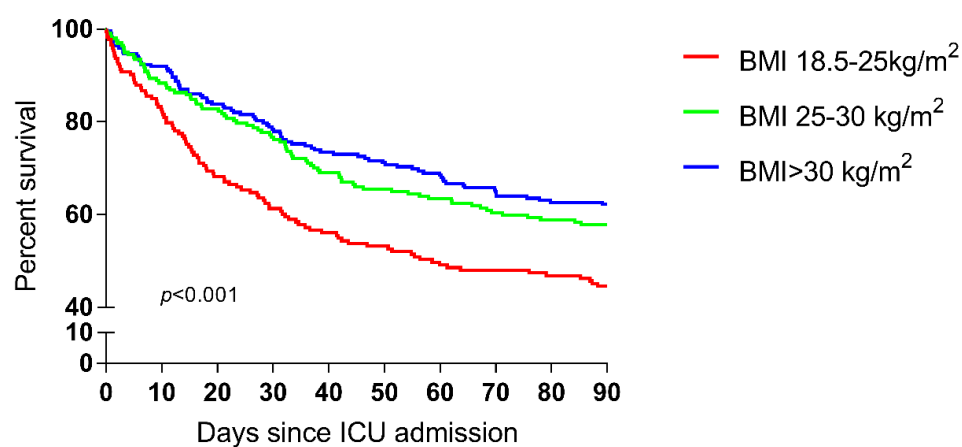

277

278 **Figure S8. Kaplan–Meier curve for 90-days survival stratified by BMI.**

279 Abbreviations: BMI: Body mass index; Fig.S8 represents 90-days Kaplan–Meier

280 curves,  $P<0.001$  by log-rank test.
